# Supplementary material for: Neutrophil gelatinase-associated lipocalin (NGAL) fails as an early predictor of contrast induced nephropathy in chronic kidney disease (ANTI-CI-AKI study)
Source: PubMed Central journal article supplement (PMC5269674; doi:10.1038/srep41300), 2017-01-27
Supplement: srep41300-s1.pdf [file srep41300-s1.pdf]

# **Neutrophil gelatinase-associated lipocalin (NGAL) fails as an early predictor of contrast induced nephropathy in chronic kidney disease (ANTI-CI-AKI study)**

Werner Ribitsch<sup>1</sup>, Gernot Schilcher<sup>1,2\*</sup>, Franz Quehenberger<sup>3</sup>, Stefan Pilz<sup>4</sup>, Rupert H Portugaller<sup>5</sup>, Martini  
Truschnig-Wilders<sup>6</sup>, Robert Zweiker<sup>7</sup>, Marianne Brodmann<sup>8</sup>, Philipp Stiegler<sup>9</sup>, Alexander R Rosenkranz<sup>1</sup>, John  
W Pickering<sup>10</sup> and Joerg H Horina<sup>1</sup>

<sup>1</sup>Clinical Division of Nephrology, Department of Internal Medicine, Medical University of Graz (MUG), Austria

<sup>2</sup>Intensive Care Unit, Department of Internal Medicine, MUG, Austria

<sup>3</sup>Institute for Medical Informatics, Statistics and Documentation, Medical University of Graz, Austria

<sup>4</sup>Division of Endocrinology and Metabolism, Department of Internal Medicine,  
Medical University of Graz, Austria

<sup>5</sup>Department of Vascular and Interventional Radiology, University Clinic of Radiology,  
Medical University of Graz, Austria

<sup>6</sup>Clinical Institute for Medical and Chemical Laboratory Diagnostics, Medical University of Graz, Austria

<sup>7</sup>Division of Cardiology, Department of Internal Medicine, Medical University of Graz, Austria

<sup>8</sup>Division of Angiology, Department of Internal Medicine, Medical University of Graz, Austria

<sup>9</sup>Division of Transplantation Surgery, Medical University of Graz, Austria

<sup>10</sup>Department of Medicine, University of Otago Christchurch and Emergency Medicine Department,  
Christchurch Hospital, Christchurch, New Zealand

## Supplementary Appendix

Supplemental Table 1. Adverse events (AE) during the ANTI-CIN -study

| <b>Adverse event (n)</b>                                          | <b>AE Day -1</b> | <b>SAE Day-1</b> | <b>AE Day 0</b> | <b>SAE Day 0</b> | <b>AE Day 1</b> | <b>SAE Day 1</b> | <b>AE Day 2</b> | <b>SAE Day 2</b> |
|-------------------------------------------------------------------|------------------|------------------|-----------------|------------------|-----------------|------------------|-----------------|------------------|
| Pain ( <i>localization</i> )                                      |                  |                  |                 |                  |                 |                  |                 |                  |
| Headache                                                          | 7                |                  | 8               |                  | 6               |                  | 2               |                  |
| Musculoskeletal system                                            | 20               |                  | 69              |                  | 25              |                  | 20              | 1                |
| Thorax                                                            | 1                |                  | 4               | 3                | 1               |                  |                 |                  |
| Abdomen                                                           | 1                |                  | 4               |                  | 1               |                  | 1               |                  |
| Cardiac<br>(Arrhythmias, NSTEMI,<br>pulmonary edema, hypotension) |                  | 4                | 27              | 6                | 7               | 4                | 1               |                  |
| Hypertensive crisis                                               | 8                |                  | 45              |                  | 9               |                  |                 |                  |
| Neurological<br>(Dizziness, mental confusion,                     | 6                | 1                | 5               | 4                | 11              | 1                | 2               | 2                |
| Nausea, vomiting                                                  | 2                | 3                | 11              |                  | 6               |                  | 3               |                  |
| Dyspnoea                                                          |                  |                  | 7               |                  | 6               |                  | 2               |                  |
| Epistaxis                                                         | 1                | 1                |                 |                  |                 |                  |                 |                  |
| Infection                                                         | 1                | 4                | 2               | 1                | 4               |                  | 2               | 2                |
| Dermatological (rash,<br>exanthema, pruritus)                     | 1                |                  | 16              |                  | 10              |                  |                 | 1                |
| Peri-interventional complications                                 |                  |                  |                 |                  |                 |                  |                 |                  |
| Dissection                                                        |                  |                  |                 |                  |                 |                  |                 |                  |
| Bradycardia                                                       |                  |                  | 5               | 30               |                 |                  |                 |                  |
| Tachycardia                                                       |                  |                  | 3               |                  |                 |                  |                 |                  |
| Hypotension                                                       |                  |                  | 5               |                  |                 |                  |                 |                  |
| Hypertension                                                      |                  |                  | 19              |                  |                 |                  |                 |                  |
| Hematoma                                                          |                  |                  | 10              |                  |                 |                  |                 |                  |
| Embolism                                                          |                  |                  | 2               |                  |                 |                  |                 |                  |
| Death                                                             |                  |                  |                 | 1                |                 |                  |                 |                  |
| Other                                                             |                  |                  | 13              |                  |                 |                  |                 |                  |
| <b>Total</b>                                                      | <b>48</b>        | <b>13</b>        | <b>255</b>      | <b>45</b>        | <b>86</b>       | <b>5</b>         | <b>33</b>       | <b>6</b>         |

Urinary NGAL and contrast induced acute kidney injury

Supplemental Table 2. Adverse reactions (AR) during the ANTI-CIN -study

| <b>Adverse reaction (n)</b>                                    | <b>AR Day -1</b> | <b>SAR Day-1</b> | <b>AR Day 0</b> |
|----------------------------------------------------------------|------------------|------------------|-----------------|
| Headache                                                       | 1                |                  |                 |
| Cardial<br>(Arrhythmias, NSTEMI, pulmonary edema, hypotension) | 1                |                  |                 |
| Hypertensive crisis                                            |                  | 2                | 1               |
| Dyspnoea                                                       | 6                |                  |                 |
| Neurological                                                   | 1                |                  |                 |
| <i>Total</i>                                                   | 9                | 2                | 1               |
